# Supplementary figures and images for: Computerised clinical decision support for suspected PE: Table 1
Source: HighWire-hosted journal article supplement (doi:10.1136/thoraxjnl-2014-206689), 2015-02-09

Figure.

PE, pulmonary embolism  
ED, Emergency Department

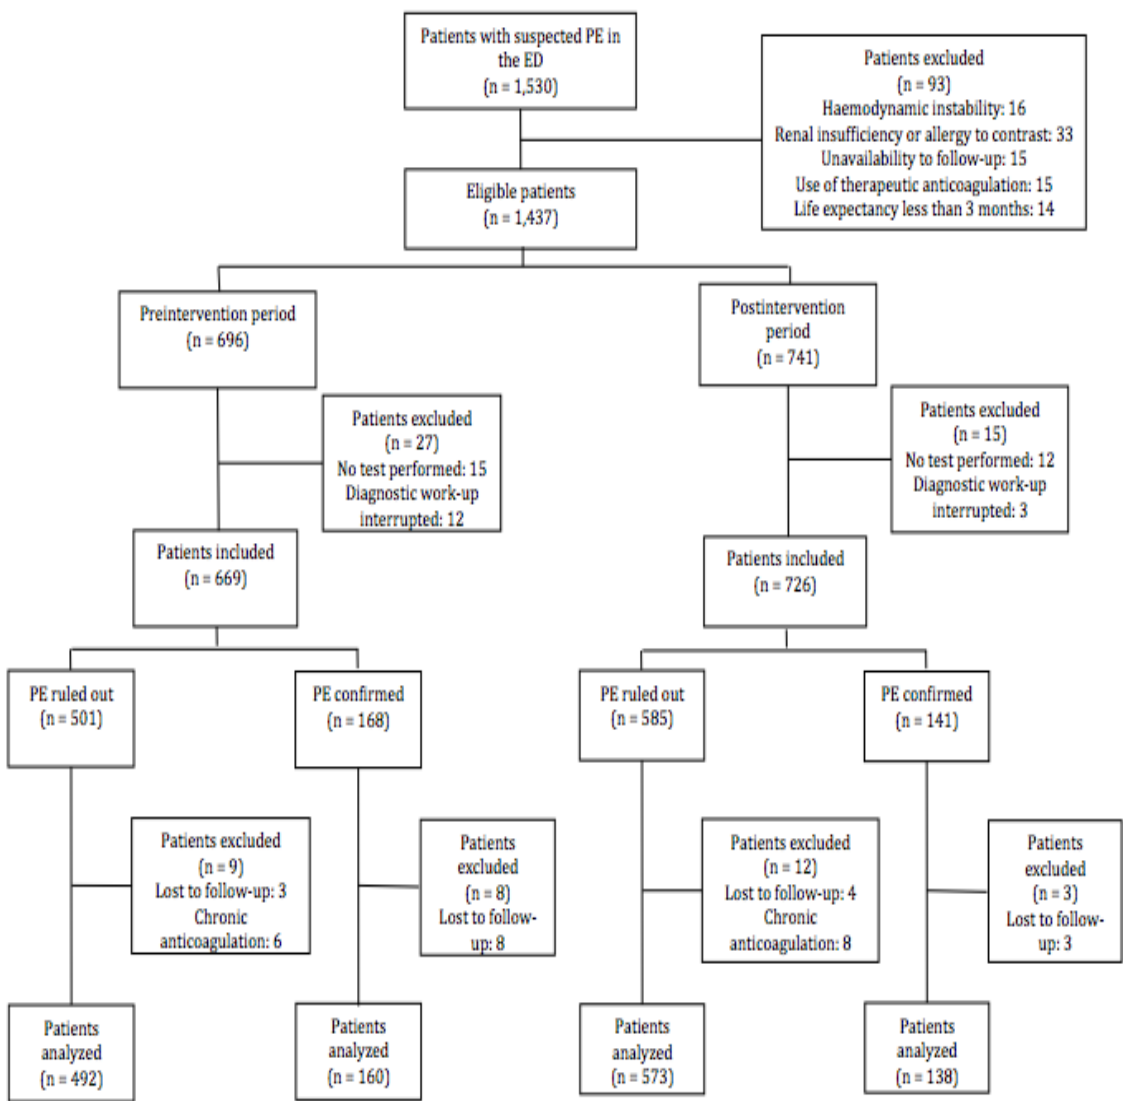

Supplement: thoraxjnl-2014-206689supp.pdf [file thoraxjnl-2014-206689supp.pdf]
